# Supplementary material for: Programming of Dopaminergic Neurons by Neonatal Sex Hormone Exposure: Effects on Dopamine Content and Tyrosine Hydroxylase Expression in Adult Male Rats
Source: Hindawi journal article supplement (doi:10.1155/2016/4569785), 2016-01-01

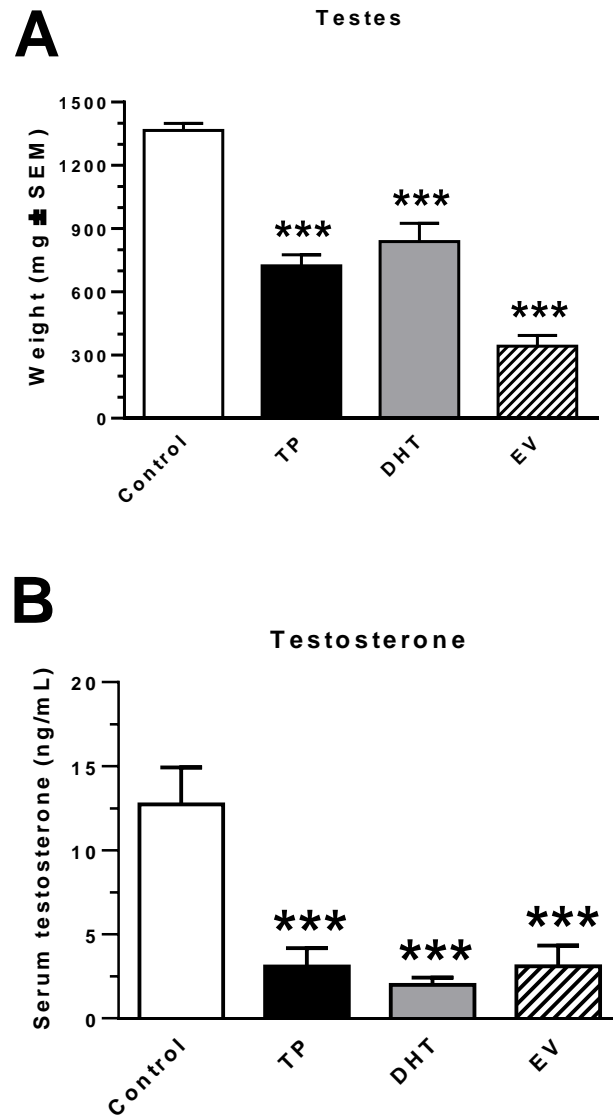

Supplement: f1 [file 4569785.f1.pdf]
